# Supplementary material
Source: PubMed Central journal article supplement (PMC8014232)

## Supplementary Online Content

Lam M, Zhu JW, Tadrous M, Drucker AM. The association between topical calcineurin inhibitor use and risk of cancer, including lymphoma, keratinocyte carcinoma, and melanoma: a systematic review and meta-analysis. *JAMA Dermatol*. Published online March 31, 2021. doi:10.1001/jamadermatol.2021.0345

**eTable 1.** Search Strategy for MEDLINE via Ovid

**eTable 2.** Search Strategy for Embase via Ovid

**eTable 3.** Search Strategy for Web of Science

**eTable 4.** Characteristics of Included Case-Control Studies on TCI Use in Participants With Cancer

**eTable 5.** Scoring Distribution of Quality Assessment of Studies Using the Newcastle-Ottawa Scale

**eTable 6.** Exposure to TCI Outcomes in Cancer Cases and Cancer-Free Controls in Case-Control Studies

**eTable 7.** Excluded Full-Text Records

**eFigure 1.** Summary of Meta-analyses of Cancer Risk With TCI Treatment and Nonactive Comparator in Cohort Studies

**eFigure 2.** Summary of Meta-analyses of Cancer Risk With TCI Treatment and TCS Comparator in Cohort Studies

**eFigure 3.** Funnel Plot for Any Cancer With Nonactive Comparator

**eFigure 4.** Funnel Plot for Lymphoma With Nonactive Comparator

**eFigure 5.** Funnel Plot for Skin Cancer With Nonactive Comparator

**eFigure 6.** Funnel Plot for Lymphoma With TCS Comparator

**eFigure 7.** Funnel Plot for Skin Cancer With TCS Comparator

This supplementary material has been provided by the authors to give readers additional information about their work.

**eTable 1.** Search Strategy for MEDLINE via Ovid

| #  | searches                                  |
|----|-------------------------------------------|
| 1  | exp neoplasms/                            |
| 2  | lymphoma/                                 |
| 3  | carcinoma/                                |
| 4  | melanoma/                                 |
| 5  | cancer*.mp.                               |
| 6  | malignan*.mp.                             |
| 7  | neoplas*.mp.                              |
| 8  | tumo*.mp.                                 |
| 9  | carcinom*.mp.                             |
| 10 | 1 or 2 or 3 or 4 or 5 or 6 or 7 or 8 or 9 |
| 11 | calcineurin inhibitors/                   |
| 12 | calcineurin inhibitor*.mp.                |
| 13 | tacrolimus/                               |
| 14 | tacrolimus.mp.                            |
| 15 | protopic.mp.                              |
| 16 | prograft.mp.                              |
| 17 | fk506.mp.                                 |
| 18 | aristoderm.mp.                            |
| 19 | tacroderm.mp.                             |
| 20 | pimecrolimus.mp.                          |
| 21 | elidel.mp.                                |
| 22 | argen.mp.                                 |
| 23 | douglan.mp.                               |
| 24 | isaplic.mp.                               |
| 25 | rizan.mp.                                 |
| 26 | OR 11-25                                  |
| 27 | ointment*.mp.                             |
| 28 | cream*.mp.                                |
| 29 | topical*.mp.                              |
| 30 | 27 or 28 or 29                            |
| 31 | 10 and 26 and 30                          |
| 32 | 10 and 26 and 30 (limit to human studies) |

Note: / - MeSH search, \* - truncation, exp – explode

**eTable 2.** Search Strategy for Embase via Ovid

| #  | searches                                  |
|----|-------------------------------------------|
| 1  | exp neoplasm/                             |
| 2  | exp malignant neoplasm/                   |
| 3  | lymphoma/                                 |
| 4  | carcinoma/                                |
| 5  | melanoma/                                 |
| 6  | cancer*.mp.                               |
| 7  | malignan*.mp.                             |
| 8  | neoplas*.mp.                              |
| 9  | carcinom*.mp.                             |
| 10 | 1 or 2 or 3 or 4 or 5 or 6 or 7 or 8 or 9 |
| 11 | calcineurin inhibitor/                    |
| 12 | tacrolimus/                               |
| 13 | pimecrolimus/                             |
| 14 | tacrolimus.mp.                            |
| 15 | protopic.mp.                              |
| 16 | prograft.mp.                              |
| 17 | fk506.mp.                                 |
| 18 | aristoderm.mp.                            |
| 19 | tacroderm.mp.                             |
| 20 | pimecrolimus.mp.                          |
| 21 | elidel.mp.                                |
| 22 | argen.mp.                                 |
| 23 | douglan.mp.                               |
| 24 | isaplic.mp.                               |
| 25 | rizan.mp.                                 |
| 26 | OR 11-25                                  |
| 27 | ointment*.mp.                             |
| 28 | cream*.mp.                                |
| 29 | topical*.mp.                              |
| 30 | 20 or 21 or 22                            |
| 31 | 10 and 26 and 30                          |
| 32 | 10 and 26 and 30 (limit to human studies) |

Note: / - MeSH search, \* - truncation, exp – explode

**eTable 3.** Search Strategy for Web of Science

| #  | searches                        |
|----|---------------------------------|
| 1  | TS=(neoplasm)                   |
| 2  | TS=("neoplas*")                 |
| 3  | TS=(lymphoma)                   |
| 4  | TS=(carcinoma)                  |
| 5  | TS=(melanoma)                   |
| 6  | TS=("malignan*")                |
| 7  | TS=("cancer*")                  |
| 8  | 1 or 2 or 3 or 4 or 5 or 6 or 7 |
| 9  | TS=(calcineurin inhibitor)      |
| 10 | TS=(tacrolimus)                 |
| 11 | TS=(pimecrolimus)               |
| 12 | 9 or 10 or 11                   |
| 13 | (TS=("topical*"))               |
| 14 | TS=("cream*")                   |
| 15 | TS=("ointment*")                |
| 16 | 13 or 14 or 15                  |
| 17 | 8 and 12 and 16                 |

**eTable 4.** Characteristics of Included Case-Control Studies on TCI Use in Participants With Cancer

| Study          | Participant source                                                                                                             | Condition                                                       | Cases    |                      |                 |                       | Controls |                      |                 | Variables matched     |
|----------------|--------------------------------------------------------------------------------------------------------------------------------|-----------------------------------------------------------------|----------|----------------------|-----------------|-----------------------|----------|----------------------|-----------------|-----------------------|
|                |                                                                                                                                |                                                                 | <i>n</i> | <i>Mean age (SD)</i> | <i>% female</i> | <i>Type of cancer</i> | <i>n</i> | <i>Mean age (SD)</i> | <i>% female</i> |                       |
| Arellano, 2006 | Atopic dermatitis patients from the PharMetrix database from July 1995 to Jan 2005; USA                                        | AD                                                              | 294      | -                    | 58.8%           | Lymphoma              | 1176     | -                    | 58.7%           | Duration of follow-up |
| Arellano, 2009 | Patients from The Health Improvement Network database with at least 6 months enrollment from Jan 1, 1992 to March 23, 2006; UK | AD                                                              | 2738     | -                    | 43.5%           | Lymphoma              | 10949    | -                    | 43.5%           | Age, sex, practice    |
| Margolis, 2007 | Patients with history of dermatitis, seen at the Department of Dermatology, University of Pennsylvania from 2002 to 2005; USA  | Dermatitis (seborrheic dermatitis, AD, dermatitis NOS, rosacea) | 866      | 66.6 (12.7)          | 45.0%           | KC                    | 1901     | 59.2 (11.9)          | 64.5%           | -                     |

Abbreviations: AD – Atopic Dermatitis; SD – Standard Deviation; KC – Keratinocyte Carcinoma

**eTable 5.** Scoring Distribution of Quality Assessment of Studies Using the Newcastle-Ottawa Scale

| <b>STUDY</b>                | <b>SELECTION</b> | <b>COMPARABILITY</b> | <b>OUTCOME</b> | <b>TOTAL</b> |
|-----------------------------|------------------|----------------------|----------------|--------------|
| <b>Cohort studies</b>       |                  |                      |                |              |
| <i>Asgari, 2020</i>         | 4                | 2                    | 3              | 9            |
| <i>Cai, 2016</i>            | 4                | 2                    | 3              | 9            |
| <i>Castellsague, 2018</i>   | 4                | 1                    | 1              | 6            |
| <i>Deleuran, 2016</i>       | 3                | 0                    | 2              | 5            |
| <i>Hui, 2009</i>            | 4                | 1                    | 1              | 6            |
| <i>Margolis, 2015</i>       | 1                | 1                    | 1              | 3            |
| <i>Paller, 2020</i>         | 1                | 2                    | 3              | 6            |
| <i>Schneeweiss, 2009</i>    | 4                | 1                    | 1              | 6            |
| <b>Case-control studies</b> |                  |                      |                |              |
| <i>Arellano, 2009</i>       | 3                | 2                    | 2              | 7            |
| <i>Arellano, 2006</i>       | 3                | 2                    | 2              | 7            |
| <i>Margolis, 2007</i>       | 2                | 1                    | 1              | 4            |

**eTable 6.** Exposure to TCI Outcomes in Cancer Cases and Cancer-Free Controls in Case-Control Studies

| Study             | Type of cancer | Treatment | n (%) cases exposed to treatment | n (%) control exposed to treatment | Odds Ratio (95% CI) | Adjusted variables                                                                                                 |
|-------------------|----------------|-----------|----------------------------------|------------------------------------|---------------------|--------------------------------------------------------------------------------------------------------------------|
| Arellano, 2009    | Lymphoma       | TAC       | 0 (0)                            | 3 (0)                              | N.A.                | N.A.                                                                                                               |
|                   |                | PIM       | 0 (0)                            | 0 (0)                              | N.A.                |                                                                                                                    |
|                   |                | TAC+PIM   | 0 (0)                            | 0 (0)                              | N.A.                |                                                                                                                    |
| Arellano, 2007    | Lymphoma       | TAC       | 11 (3.7)                         | 41 (3.5)                           | 0.79 (0.37-1.71)    | sex, age, region, specialty, presence of infectious mononucleosis, asthma diagnosis, asthma drug use, oral steroid |
|                   |                | PIM       | 14 (4.8)                         | 65 (5.5)                           | 0.82 (0.42-1.61)    |                                                                                                                    |
|                   |                | TAC+PIM   | 4 (1.4)                          | 9 (0.8)                            | 1.01 (0.25-4.12)    |                                                                                                                    |
| Margolis, 2007    | KC             | TAC       | 57 (6.9)                         | 354 (19.6)                         | 0.43 (0.30-0.60)    | age, gender, history of AD, previous history of NMSC                                                               |
|                   |                | PIM       | 88 (10.4)                        | 383 (20.7)                         | 0.66 (0.-500.89)    |                                                                                                                    |
|                   |                | TAC+PIM   | 123 (14.4)                       | 587 (30.7)                         | 0.54 (0.41-0.69)    |                                                                                                                    |
| Schneeweiss, 2009 | Lymphoma       | TAC       | 13 (52.0)                        | 49 (49.0)                          | Ref.*               | Propensity score at cohort entry                                                                                   |
|                   |                | PIM       | 11 (44.0)                        | 48 (48.0)                          | 0.86 (0.35-2.12)*   |                                                                                                                    |
|                   |                | TAC+PIM   | 1 (4.0)                          | 3 (3.0)                            | 1.26 (0.12-13.1)*   |                                                                                                                    |

Abbreviations: KC – Keratinocyte carcinoma; CI – confidence interval; N.A. – not applicable

\*Odds ratio for TCI use comparing Pimecrolimus and Tacrolimus in cases of lymphoma and cancer-free controls

**eTable 7.** Excluded Full-Text Records

| <i>Citation</i>                                                                                                                                                                                                                                                                                                                             | <i>Reason for exclusion</i> |
|---------------------------------------------------------------------------------------------------------------------------------------------------------------------------------------------------------------------------------------------------------------------------------------------------------------------------------------------|-----------------------------|
| Gardenier, Jason C; Kataru, Raghu P; Hespe, Geoffrey E; Savetsky, Ira L; Torrissi, Jeremy S; Nores, Gabriela D Garcia; Jowhar, Dawit K; Nitti, Matthew D; Schofield, Ryan C; Carlow, Dean C; Mehrara, Babak J<br><br>Topical tacrolimus for the treatment of secondary lymphedema.<br>Nature communications / 2017;8(101528555):14345       | Animal study                |
| Anderson, Kathryn; Ascanio, Nicole M; Kinney, Megan A; Krowchuk, Daniel P; Jorizzo, Joseph L<br><br>A retrospective analysis of pediatric patients with lichen sclerosus treated with a standard protocol of class I topical corticosteroid and topical calcineurin inhibitor.<br>The Journal of dermatological treatment / 2016;27(1):64-6 | Case report / Case series   |
| Bastida, Jesus; Valeron-Almazan, Pedro; Santana-Molina, Nestor; Medina-Gil, Carolina; Carretero-Hernandez, Gregorio<br><br>Treatment of folliculitis decalvans with tacrolimus ointment.<br>International journal of dermatology / 2012;51(2):216-20                                                                                        | Case report / Case series   |
| Bernard L.A.; Cunningham B.B.; Al-Suwaidan S.; Friedlander S.F.; Eichenfield L.F.<br><br>A rosacea-like granulomatous eruption in a patient using tacrolimus ointment for atopic dermatitis [7]<br>Archives of Dermatology / 2003;139(2):229-231                                                                                            | Case report / Case series   |
| Birnbaum F.; Reis A.; Reinhard T.<br><br>Long term use of topical tacrolimus (FK506) in high-risk penetrating keratoplasty<br>Cornea / 2009;28(6):715-716                                                                                                                                                                                   | Case report / Case series   |
| Fischer, Gayle; Bradford, Jennifer<br><br>Topical immunosuppressants, genital lichen sclerosus and the risk of squamous cell carcinoma: a case report.<br>The Journal of reproductive medicine / 2007;52(4):329-31                                                                                                                          | Case report / Case series   |
| Fricain, J. C.; Sibaud, V.; Swetyenga, N.; Tabrizi, R.; Campana, F.; Taieb, A.<br><br>Long-term efficacy of topical tacrolimus on oral lesions of chronic graft-versus-host disease<br>British Journal of Dermatology 2007;156(3):588-590                                                                                                   | Case report / Case series   |
| Garcia-Delgado R.; Escario-Travesedo E.; Sanchez-Romero A.<br><br>Systemic Absorption of Topical Tacrolimus in Metastatic Crohn Disease With Skin Ulcers<br>Actas Dermo-Sifiliograficas / 2016;107(10):866-867                                                                                                                              | Case report / Case series   |
| Gordon M.K.; Kraus M.; van Besien K.<br><br>Interdigitating dendritic cell tumors in two patients exposed to topical calcineurin inhibitors [5]<br>Leukemia and Lymphoma / 2007;48(4):816-818                                                                                                                                               | Case report / Case series   |
| Jung, Ji Won; Lee, Young Ji; Yoon, Sang Chul; Kim, Tae-Im; Kim, Eung Kweon; Seo, Kyoung Yul<br><br>Long-term result of maintenance treatment with tacrolimus ointment in chronic ocular graft-versus-host disease.<br>American journal of ophthalmology / 2015;159(3):519-27.e1                                                             | Case report / Case series   |



|                                                                                                                                                                                                                                                                                                                                                                              |                           |
|------------------------------------------------------------------------------------------------------------------------------------------------------------------------------------------------------------------------------------------------------------------------------------------------------------------------------------------------------------------------------|---------------------------|
| <p>Kelekci, Handan Kiyemet; Uncu, Hikmet Gulsen; Yilmaz, Bulent; Ozdemir, Orcun; Sut, Necdet; Kelekci, Sefa</p> <p>Pimecrolimus 1% cream for pruritus in postmenopausal diabetic women with vulvar lichen simplex chronicus: a prospective non-controlled case series.<br/>The Journal of dermatological treatment / 2008;19(5):274-8</p>                                    | Case report / Case series |
| <p>Lan, C Ce; Wu, C S; Chen, G S; Yu, H S</p> <p>Helium-neon laser and topical tacrolimus combination therapy: novel treatment option for vitiligo without additional photocarcinogenic risks.<br/>Journal of the European Academy of Dermatology and Venereology : JEADV / 2009;23(3):344-5</p>                                                                             | Case report / Case series |
| <p>Langeland T.; Engh V.</p> <p>Topical use of tacrolimus and squamous cell carcinoma on the penis [8]<br/>British Journal of Dermatology, Supplement / 2005;152(1):183-185</p>                                                                                                                                                                                              | Case report / Case series |
| <p>Lee Y.J.; Kim S.W.; Seo K.Y.</p> <p>Application for Tacrolimus Ointment in Treating Refractory Inflammatory Ocular Surface Diseases<br/>American Journal of Ophthalmology / 2013;155(5)</p>                                                                                                                                                                               | Case report / Case series |
| <p>Mattsson, Ulf; Magnusson, Bengt; Jontell, Mats</p> <p>Squamous cell carcinoma in a patient with oral lichen planus treated with topical application of tacrolimus.<br/>Oral surgery, oral medicine, oral pathology, oral radiology, and endodontics / 2010;110(1):e19-25</p>                                                                                              | Case report / Case series |
| <p>Miura, Hiroyuki; Itami, Satoshi; Yoshikawa, Kunihiro</p> <p>Treatment of facial lesion of cutaneous plasmacytosis with tacrolimus ointment.<br/>Journal of the American Academy of Dermatology / 2003;49(6):1195-6</p>                                                                                                                                                    | Case report / Case series |
| <p>Miyazaki D.; Tominaga T.; Kakimaru-Hasegawa A.; Nagata Y.; Hasegawa J.; Inoue Y.</p> <p>Therapeutic Effects of Tacrolimus Ointment for Refractory Ocular Surface Inflammatory Diseases<br/>Ophthalmology / 2008;115(6):988</p>                                                                                                                                            | Case report / Case series |
| <p>Nikolaou, V; Stratigos, A; Antoniou, C; Kiagia, M; Nikolaou, C; Katsambas, A; Syrigos, K</p> <p>Pimecrolimus cream 1% for the treatment of papulopustular eruption related to epidermal growth factor receptor inhibitors: a case series and a literature review of therapeutic approaches.<br/>Dermatology (Basel, Switzerland) / 2010;220(3):243-8</p>                  | Case report / Case series |
| <p>Pagliariello C.; Fabrizi G.; Fantini C.; Cortelazzi C.; Boccaletti V.; Annessi G.; Zampetti A.; Feliciani C.; Di Nuzzo S.</p> <p>Calcipotriol/betamethasone dipropionate ointment compared with tacrolimus ointment for the treatment of erosive pustular dermatosis of the scalp: A split-lesion comparison<br/>European Journal of Dermatology / 2015;25(2):206-208</p> | Case report / Case series |
| <p>Pleasant, Latawnya; Skinner, Sean; Pulliam, Joseph; Challa, Harigovinda; D'Orazio, John</p> <p>Burkitt lymphoma in a child with atopic dermatitis and a 7-year history of regular topical tacrolimus use.<br/>Cutis / 2012;89(3):117-20</p>                                                                                                                               | Case report / Case series |

|                                                                                                                                                                                                                                                                                                         |                              |
|---------------------------------------------------------------------------------------------------------------------------------------------------------------------------------------------------------------------------------------------------------------------------------------------------------|------------------------------|
| Saez M.; Rodriguez-Martin M.; Sidro M.; Carnerero A.; Garcia-Bustinduy M.; Noda A.<br>Successful treatment of erosive pustular dermatosis of the scalp with topical tacrolimus [19]<br>Clinical and Experimental Dermatology / 2005;30(5):599-600                                                       | Case report / Case series    |
| Schmook T.; Kraft J.; Benninghoff B.; Nindl I.; Roewert J.; Ulrich C.; Stockfleth E.<br>Treatment of cutaneous chronic graft-versus-host disease with topical pimecrolimus [4]<br>Bone Marrow Transplantation / 2005;36(1):87-88                                                                        | Case report / Case series    |
| Tam, P M K; Young, A L; Cheng, L L; Lam, P T H<br>Topical 0.03% tacrolimus ointment in the management of ocular surface inflammation in chronic GVHD.<br>Bone marrow transplantation / 2010;45(5):957-8                                                                                                 | Case report / Case series    |
| Ueda M.; Makinodan R.; Matsumura M.; Ichihashi M.<br>Successful treatment of amyopathic dermatomyositis with topical tacrolimus [4]<br>British Journal of Dermatology / 2003;148(3):595-596                                                                                                             | Case report / Case series    |
| Vecchietti G.; Kerl K.; Hugli A.; Samson J.; Borradori L.<br>Topical tacrolimus (FK506) for relapsing erosive stomatitis in paraneoplastic pemphigus [9]<br>British Journal of Dermatology / 2003;148(4):833-834                                                                                        | Case report / Case series    |
| Vence L.; Thompson C.B.; Callen J.P.; Brown T.S.<br>Giant Porokeratosis with Malignant Transformation to Squamous Cell Carcinoma<br>Dermatologic Surgery / 2018;44(4):580-581                                                                                                                           | Case report / Case series    |
| Yasuda, Masahito; Amano, Hiroo; Nagai, Yayoi; Tamura, Atsushi; Ishikawa, Osamu; Yamaguchi, Satoru<br>Pyodermatitis-pyostomatitis vegetans associated with ulcerative colitis: successful treatment with total colectomy and topical tacrolimus.<br>Dermatology (Basel, Switzerland) / 2008;217(2):146-8 | Case report / Case series    |
| Zhang, Xuepeng; Yang, Kaiying; Chen, Siyuan; Ji, Yi<br>Tacrolimus ointment for the treatment of superficial kaposiform hemangioendothelioma and tufted angioma.<br>The Journal of dermatology / 2019;46(10):898-901                                                                                     | Case report / Case series    |
| Anonymous.<br>Impact of genital lichen sclerosus treatments on occurrence of vulvar neoplasms in 275 adult women<br>Journal of the American Academy of Dermatology / 2018;79(3 Supplement 1):AB158                                                                                                      | Conference abstract / poster |
| Arana A.; Wentworth C.; Conde E.<br>Incidence of lymphoma in a large population of patients with atopic dermatitis, some treated with topical calcineurin inhibitors or topical corticosteroids<br>Allergy: European Journal of Allergy and Clinical Immunology / 2012;67(SUPPL. 96):15                 | Conference abstract / poster |
| Arana, A.; Wentworth, C. W.; Rivero, E.; Plana, E.; Conde, E.<br>Lymphoma among Patients with Atopic Dermatitis Treated with Topical Corticosteroids (TCS) and/or Topical Calcineurin Inhibitors (TCIs)<br>Pharmacoepidemiology and Drug Safety 2010;19():S12-S12                                       | Conference abstract / poster |

|                                                                                                                                                                                                                                                                                                                                                                                                                                                                                    |                                     |
|------------------------------------------------------------------------------------------------------------------------------------------------------------------------------------------------------------------------------------------------------------------------------------------------------------------------------------------------------------------------------------------------------------------------------------------------------------------------------------|-------------------------------------|
| <p>Arana, A.; Wentworth, C. W.; Rivero, E.; Planas, E.; Conde, E.</p> <p>Lymphoma among patients with atopic dermatitis treated with topical corticosteroids and/or topical calcineurin inhibitors</p> <p>Journal of the American Academy of Dermatology 2011;64(2):AB3-AB3</p>                                                                                                                                                                                                    | <p>Conference abstract / poster</p> |
| <p>Arellano, F. M.; Arana, A.; Wentworth, C. E.; Fernandez-Vidaurre, C.; Schlienger, R.; Conde, E.</p> <p>Risk of lymphoma risk among users of topical corticosteroids and topical calcineurin inhibitors. Preliminary results</p> <p>Pharmacoepidemiology and Drug Safety 2007;16():S12-S12</p>                                                                                                                                                                                   | <p>Conference abstract / poster</p> |
| <p>Arellano, F. M.; Arana, A.; Wentworth, C. E.; Fernandez-Vidaurre, C.; Schlienger, R.; Conde, E.</p> <p>Risk of lymphoma among users of topical corticosteroids and topical calcineurin inhibitors</p> <p>Journal of Investigative Dermatology 2007;127():S62-S62</p>                                                                                                                                                                                                            | <p>Conference abstract / poster</p> |
| <p>Arellano, F. M.; Wentworth, C. E.; Arana, A.; Fernandez, C.; Paul, C.</p> <p>Risk of lymphoma following exposure to calcineurin inhibitors and topical steroids in patients with atopic dermatitis</p> <p>Pharmacoepidemiology and Drug Safety 2006;15():S63-S64</p>                                                                                                                                                                                                            | <p>Conference abstract / poster</p> |
| <p>Armstrong A.; Grabner M.; Stephenson J.; Zhao R.; Mallya U.; Bieszk N.; Miao R.; Gadkari A.; Chao J.</p> <p>Treatment-emergent acute complications from immunosuppressant use in adult patients with atopic dermatitis in the U.S</p> <p>Journal of Managed Care and Specialty Pharmacy / 2018;24(4-A SUPPL.):S78-S79</p>                                                                                                                                                       | <p>Conference abstract / poster</p> |
| <p>Cai S.C.S.; Li W.; Tian E.A.L.; Tang M.B.Y.; Allen J.C.; Tey H.L.</p> <p>Topical tacrolimus in endogenous eczema and cancer association</p> <p>Annals of the Academy of Medicine Singapore / 2014;43(9 SUPPL. 1):S1</p>                                                                                                                                                                                                                                                         | <p>Conference abstract / poster</p> |
| <p>Castellsague J.; Calingaert B.; Rothman K.J.; Gutierrez L.; Van Herk-Sukel M.P.P.; Kuiper J.J.G.; Pottegard A.; Hallas J.; Berglind I.A.; Sundstrom A.; Dedman D.; Gallagher A.; Kaye J.A.; Pardo C.; Perez-Gutthann S.</p> <p>Probabilistic bias analysis for unmeasured confounders in a study of users of topical tacrolimus, pimecrolimus and corticosteroids (JOELLE) study</p> <p>Pharmacoepidemiology and Drug Safety / 2016;25(Supplement 3):142-143</p>                | <p>Conference abstract / poster</p> |
| <p>Castellsague J.; Kuiper J.J.G.; Pottegard A.; Berglind I.A.; Dedman D.; Gutierrez L.; Calingaert B.; Van Herk-Sukel M.P.P.; Hallas J.; Sundstrom A.; Gallagher A.; Kaye J.A.; Pardo C.; Rothman K.J.; Perez-Gutthann S.</p> <p>Risk of lymphoma in users of topical tacrolimus, pimecrolimus and corticosteroids (JOELLE Study)</p> <p>Pharmacoepidemiology and Drug Safety / 2016;25(Supplement 3):494-495</p>                                                                 | <p>Conference abstract / poster</p> |
| <p>Castellsague J.; Van Herk-Sukel M.P.P.; Hallas J.; Sundstrom A.; Gallagher A.; Gutierrez L.; Calingaert B.; Kuiper J.J.G.; Pottegard A.; Berglind I.A.; Dedman D.; Kaye J.A.; Pardo C.; Rothman K.J.; Perez-Gutthann S.</p> <p>Risk of skin cancer in users of topical tacrolimus, pimecrolimus and corticosteroids. Joint European Longitudinal Lymphoma and Skin Cancer Evaluation (JOELLE) study</p> <p>Pharmacoepidemiology and Drug Safety / 2016;25(Supplement 3):527</p> | <p>Conference abstract / poster</p> |

|                                                                                                                                                                                                                                                                                                                                                                                                                                        |                                     |
|----------------------------------------------------------------------------------------------------------------------------------------------------------------------------------------------------------------------------------------------------------------------------------------------------------------------------------------------------------------------------------------------------------------------------------------|-------------------------------------|
| <p>Craig F.; Greenlaw N.; Harrison E.; Mason J.; Mitchell E.; Norrie J.; Ormerod A.; Thomas K.; Williams H.</p> <p>Clinical outcomes of patients receiving topical treatments for pyoderma gangrenosum: A prospective observational study<br/>British Journal of Dermatology / 2014;171(SUPPL. 1):53</p>                                                                                                                               | <p>Conference abstract / poster</p> |
| <p>Deleuran, M.; Vestergaard, C.; Thestrup-Pedersen, K.</p> <p>Topical calcineurin inhibitors and cancer in children: a register study<br/>British Journal of Dermatology 2014;170(6):E55-E55</p>                                                                                                                                                                                                                                      | <p>Conference abstract / poster</p> |
| <p>Dell E.; Miest R.; Lohse C.; Torgerson R.</p> <p>Impact of genital lichen sclerosus treatments on occurrence of vulvar neoplasms in 275 adult women<br/>Journal of the American Academy of Dermatology / 2018;79(3 Supplement 1):AB158</p>                                                                                                                                                                                          | <p>Conference abstract / poster</p> |
| <p>Feng, J.; Tsai, A.; Raimondo, D.; Quesenberry, C. P.; Asgari, M.</p> <p>Skin cancer risk among adults with atopic dermatitis exposed to topical calcineurin inhibitors<br/>Journal of Investigative Dermatology 2018;138(5):S55-S55</p>                                                                                                                                                                                             | <p>Conference abstract / poster</p> |
| <p>Godat S.; Fournier N.; Pittet V.; Safroneeva E.; Moradpour D.; Schoepfer A.</p> <p>Frequency and type of side effects of immunomodulating medication in the swiss inflammatory bowel disease cohort<br/>Gastroenterology / 2012;142(5 SUPPL. 1):S249</p>                                                                                                                                                                            | <p>Conference abstract / poster</p> |
| <p>Gutierrez L.; Booth H.; Dedman D.; Crellin E.; Kaye J.A.; Franzoni C.; Arana A.; Schmitt-Egenolf M.; Sundstrom A.; Bystrom C.</p> <p>Case validation of cutaneous lymphoma to minimize protopathic bias<br/>Pharmacoepidemiology and Drug Safety / 2019;28(Supplement 2):315</p>                                                                                                                                                    | <p>Conference abstract / poster</p> |
| <p>Kiiski V.; Remitz A.; Reitamo S.; Peltonen S.; Mandelin J.; Kari O.</p> <p>Safety and efficacy of tacrolimus ointment in the longterm use for atopic blepharoconjunctivitis<br/>Acta Ophthalmologica / 2012;90(SUPPL. 250):14</p>                                                                                                                                                                                                   | <p>Conference abstract / poster</p> |
| <p>Kuiper J.G.; Van Herk-Sukel M.P.; Castellsague J.; Pottegard A.; Anveden Berglind I.; Dedman D.; Gutierrez L.; Calingaert B.; Hallas J.; Sundstrom A.; Gallagher A.M.; Kaye J.A.; Pardo C.; Perez-Guttham S.</p> <p>Utilization of topical tacrolimus and topical pimecrolimus in Europe: Results from the joint European longitudinal lymphoma and skin cancer evaluation (Joelle) study<br/>Value in Health / 2016;19(7):A573</p> | <p>Conference abstract / poster</p> |
| <p>Leite M.I.B.A.P.; Leitao C.; Ribeiro A.; Leite A.L.; Osorio E.</p> <p>Childhood granuloma annulare. A 16-year clinical perspective from a Pediatric Hospital Dermatology Department<br/>Cogent Medicine / 2017;4(1):</p>                                                                                                                                                                                                            | <p>Conference abstract / poster</p> |
| <p>Liau M.Q.M.; Leung A.J.; Aw C.W.D.</p> <p>5-Year retrospective study of topical calcineurin inhibitor use in a Singaporean tertiary hospital<br/>Annals of the Academy of Medicine Singapore / 2016;45(9 Supplement 1):S262</p>                                                                                                                                                                                                     | <p>Conference abstract / poster</p> |

|                                                                                                                                                                                                                                                                                                                                                                                                                                                                                                                                                                              |                                                   |
|------------------------------------------------------------------------------------------------------------------------------------------------------------------------------------------------------------------------------------------------------------------------------------------------------------------------------------------------------------------------------------------------------------------------------------------------------------------------------------------------------------------------------------------------------------------------------|---------------------------------------------------|
| <p>Manthripragada A.D.; Pinheiro S.P.; MaCurdy T.E.; Saneinejad S.; Graham D.J.</p> <p>Characteristics and patterns of topical calcineurin inhibitor use in children<br/>Pharmacoepidemiology and Drug Safety / 2011;20(SUPPL. 1):S76-S77</p>                                                                                                                                                                                                                                                                                                                                | <p>Conference abstract / poster</p>               |
| <p>Margolis, D.; Hoffstad, O.; Bilker, W.</p> <p>Is there an association between the use of topical calcineurin inhibitors and skin cancer?<br/>Journal of Investigative Dermatology 2006;126():48-48</p>                                                                                                                                                                                                                                                                                                                                                                    | <p>Conference abstract / poster</p>               |
| <p>Margolis, D. J.; Hofstad, O.; Bilker, W.</p> <p>A potential protective effect of topical calcineurin inhibitors with respect to non melanoma skin cancer<br/>Pharmacoepidemiology and Drug Safety 2006;15():S257-S258</p>                                                                                                                                                                                                                                                                                                                                                 | <p>Conference abstract / poster</p>               |
| <p>Mashiah J.; Kutz A.; Bodemer C.; Rabia S.H.; Goldberg I.; Sprecher E.; Harel A.</p> <p>Topical pimecrolimus for pediatric cutaneous mastocytosis<br/>Pediatric Dermatology / 2016;33(SUPPL. 1):S52</p>                                                                                                                                                                                                                                                                                                                                                                    | <p>Conference abstract / poster</p>               |
| <p>Negoita M.; Sugarman I.; Puntis J.W.L.; Zamvar V.; Vora R.; Grange S.</p> <p>Genital Crohn's disease case series-natural history<br/>Journal of Pediatric Gastroenterology and Nutrition / 2017;64(Supplement 1):522-523</p>                                                                                                                                                                                                                                                                                                                                              | <p>Conference abstract / poster</p>               |
| <p>Scarlsbrick J.J.; Dignan F.L.; Tulpule S.; Das gupta E.; Shah G.; Pagliuca A.; Malladi R.; Raj K.</p> <p>A multicentre retrospective UK study detailing onset of graft versus host disease, responses to treatment and outcome after donor lymphocyte infusion following haemopoietic stem cell transplantation: Rates of GVHD are high but death from GVHD infrequent<br/>Blood / 2013;122(21):</p>                                                                                                                                                                      | <p>Conference abstract / poster</p>               |
| <p>Tey H.L.; Cai S.; Li W.; Allen J.</p> <p>Topical calcineurin inhibitors in endogenous eczema and cancer association: A cohort study<br/>Acta Dermato-Venereologica / 2015;95(7):891</p>                                                                                                                                                                                                                                                                                                                                                                                   | <p>Conference abstract / poster</p>               |
| <p>Tjahjono L.; Davis M.D.; Tollefson M.; Khan S.; Rodriguez V.; Lehman J.</p> <p>Cutaneous manifestations of pediatric graft-versus-host disease<br/>Journal of the American Academy of Dermatology / 2018;79(3 Supplement 1):AB94</p>                                                                                                                                                                                                                                                                                                                                      | <p>Conference abstract / poster</p>               |
| <p>Cooper S.M.; Wojnarowska F.</p> <p>Influence of treatment of erosive lichen planus of the vulva on its prognosis<br/>Archives of Dermatology / 2006;142(3):289-294</p>                                                                                                                                                                                                                                                                                                                                                                                                    | <p>did not examine association b/n TCI+cancer</p> |
| <p>Fahy C.M.R.; Torgerson R.R.; Davis M.D.P.</p> <p>Lichen planus affecting the female genitalia: A retrospective review of patients at Mayo Clinic<br/>Journal of the American Academy of Dermatology / 2017;77(6):1053-1059</p>                                                                                                                                                                                                                                                                                                                                            | <p>did not examine association b/n TCI+cancer</p> |
| <p>Godat, Sebastien; Fournier, Nicolas; Safroneeva, Ekaterina; Juillerat, Pascal; Nydegger, Andreas; Straumann, Alex; Vavricka, Stephan; Biedermann, Luc; Greuter, Thomas; Fraga, Montserrat; Abdelrahman, Karim; Hahnloser, Dieter; Sauter, Bernhard; Rogler, Gerhard; Michetti, Pierre; Schoepfer, Alain M; Swiss IBD Cohort Study Group</p> <p>Frequency and type of drug-related side effects necessitating treatment discontinuation in the Swiss Inflammatory Bowel Disease Cohort.<br/>European journal of gastroenterology &amp; hepatology / 2018;30(6):612-620</p> | <p>did not examine association b/n TCI+cancer</p> |

|                                                                                                                                                                                                                                                                                                                                                                                                                  |                                            |
|------------------------------------------------------------------------------------------------------------------------------------------------------------------------------------------------------------------------------------------------------------------------------------------------------------------------------------------------------------------------------------------------------------------|--------------------------------------------|
| Kennedy, C. M.; Peterson, L. B.; Galask, R. P.<br><br>Erosive Vulvar Lichen Planus A Cohort at Risk for Cancer?<br>Journal of Reproductive Medicine 2008;53(10):781-784                                                                                                                                                                                                                                          | did not examine association b/n TCI+cancer |
| Mawardi H.; Elad S.; Correa M.E.; Stevenson K.; Woo S.-B.; Almazrooa S.; Haddad R.; Antin J.H.; Soiffer R.; Treister N.<br><br>Oral epithelial dysplasia and squamous cell carcinoma following allogeneic hematopoietic stem cell transplantation: Clinical presentation and treatment outcomes<br>Bone Marrow Transplantation / 2011;46(6):884-891                                                              | did not examine association b/n TCI+cancer |
| Santegoets, L. A. M.; Helmerhorst, T. J. M.; van der Meijden, W. I.<br><br>A Retrospective Study of 95 Women With a Clinical Diagnosis of Genital Lichen Planus<br>Journal of Lower Genital Tract Disease 2010;14(4):323-328                                                                                                                                                                                     | did not examine association b/n TCI+cancer |
| Scarisbrick J.J.; Dignan F.L.; Tulpule S.; Gupta E.D.; Kolade S.; Shaw B.; Evison F.; Shah G.; Tholouli E.; Mufti G.; Pagliuca A.; Malladi R.; Raj K.<br><br>A multicentre UK study of GVHD following DLI: Rates of GVHD are high but mortality from GVHD is infrequent<br>Bone Marrow Transplantation / 2015;50(1):62-67                                                                                        | did not examine association b/n TCI+cancer |
| Simpson R.C.; Littlewood S.M.; Cooper S.M.; Cruickshank M.E.; Green C.M.; Derrick E.; Yell J.; Chiang N.; Bell H.; Owen C.; Javed A.; Wilson C.L.; McLelland J.; Murphy R.<br><br>Real-life experience of managing vulval erosive lichen planus: A case-based review and U.K. multicentre case note audit<br>British Journal of Dermatology / 2012;167(1):85-91                                                  | did not examine association b/n TCI+cancer |
| Weyers W.<br><br>Hypertrophic lichen sclerosus with dyskeratosis and parakeratosis - A common presentation of vulvar lichen sclerosus not associated with a significant risk of malignancy<br>American Journal of Dermatopathology / 2013;35(7):713-721                                                                                                                                                          | did not examine association b/n TCI+cancer |
| Yosipovitch, Gil; Tan, Audrey; LoSicco, Katherine; Manabat, Catherine G; Kannagra, Ajith; Carroll, Christie; Chan, Yiong Huak; Ng, Patricia; Jorizzo, Joseph<br><br>A comparative study of clinical characteristics, work-up, treatment, and association to malignancy in dermatomyositis between two tertiary skin centers in the USA and Singapore.<br>International journal of dermatology / 2013;52(7):813-9 | did not examine association b/n TCI+cancer |
| Marquezan M.C.; Nascimento H.; Vieira L.A.; Serapiao M.; Ghanem R.C.; Belfort R.; Freitas D.<br><br>Effect of Topical Tacrolimus in the Treatment of Thygeson's Superficial Punctate Keratitis<br>American Journal of Ophthalmology / 2015;160(4):663-668                                                                                                                                                        | did not examine association b/n TCI+cancer |
| Fischer, G.; Bradford, J.<br><br>Topical immunosuppressants, genital lichen sclerosus and the risk of squamous cell carcinoma<br>Journal of Reproductive Medicine 2007;52(4):329-331                                                                                                                                                                                                                             | duplicate                                  |
| Langa Y.; Van der Merwe E.<br><br>Atopic dermatitis: Tacrolimus vs. topical corticosteroid use<br>South African Family Practice / 2011;53(4):340-346                                                                                                                                                                                                                                                             | duplicate                                  |
| Schmook, T; Kraft, J; Benninghoff, B; Nindl, I; Roewert, J; Ulrich, C; Stockfleth, E                                                                                                                                                                                                                                                                                                                             | duplicate                                  |

|                                                                                                                                                                                                                                                                                                                                                       |                                   |
|-------------------------------------------------------------------------------------------------------------------------------------------------------------------------------------------------------------------------------------------------------------------------------------------------------------------------------------------------------|-----------------------------------|
| Treatment of cutaneous chronic graft-versus-host disease with topical pimecrolimus.<br>Bone marrow transplantation / 2005;36(1):87-8                                                                                                                                                                                                                  |                                   |
| Gordon, Melinda K; Kraus, Madeleine; van Besien, Koen<br>Interdigitating dendritic cell tumors in two patients exposed to topical calcineurin inhibitors.<br>Leukemia & lymphoma / 2007;48(4):816-8                                                                                                                                                   | duplicate                         |
| Vecchiotti, G; Kerl, K; Hugli, A; Samson, J; Borradori, L<br>Topical tacrolimus (FK506) for relapsing erosive stomatitis in paraneoplastic pemphigus.<br>The British journal of dermatology / 2003;148(4):833-4                                                                                                                                       | duplicate                         |
| Chapman M.S.; Schachner L.A.; Breneman D.; Boguniewicz M.; Gold M.H.; Shull T.; Linowski G.J.; Jaracz E.<br>Tacrolimus ointment 0.03% shows efficacy and safety in pediatric and adult patients with mild to moderate atopic dermatitis<br>Journal of the American Academy of Dermatology / 2005;53(2 SUPPL. 2):S177-S185                             | experimental / clinical trial     |
| Luger T.A.; Lahfa M.; Folster-Holst R.; Gulliver W.P.; Allen R.; Molloy S.; Barbier N.; Paul C.; Bos J.D.<br>Long-term safety and tolerability of pimecrolimus cream 1% and topical corticosteroids in adults with moderate to severe atopic dermatitis<br>Journal of Dermatological Treatment / 2004;15(3):169-178                                   | experimental / clinical trial     |
| Sigurgeirsson B.; Boznanski A.; Todd G.; Vertruyen A.; Schuttelaar M.-L.A.; Zhu X.; Schauer U.; Qaqundah P.; Poulin Y.; Kristjansson S.; Von Berg A.; Nieto A.; Boguniewicz M.; Paller A.S.; Dakovic R.; Ring J.; Luger T.<br>Safety and efficacy of pimecrolimus in atopic dermatitis: A 5-year randomized trial<br>Pediatrics / 2015;135(4):597-606 | experimental / clinical trial     |
| Anonymous.<br>Topical tacrolimus for treatment of atopic dermatitis<br>Medical Letter on Drugs and Therapeutics / 2001;43(1102):33-34                                                                                                                                                                                                                 | Letter/editorial no original data |
| Bunker, C B; Neill, S; Staughton, R C D<br>Topical tacrolimus, genital lichen sclerosus, and risk of squamous cell carcinoma.<br>Archives of dermatology / 2004;140(9):1169                                                                                                                                                                           | Letter/editorial no original data |
| Cao B.L.<br>Challenges in assessing rare risks associated with topical calcineurin inhibitors for the treatment of eczema<br>Journal of Dermatological Treatment / 2018;29(8):825                                                                                                                                                                     | Letter/editorial no original data |
| Haley, C. T.; Mui, U. N.; Tying, S. K.<br>Safety of Topical Calcineurin Inhibitors for Hailey-Hailey Disease Reply<br>Jama-Journal of the American Medical Association 2018;320(11):1200-1201                                                                                                                                                         | Letter/editorial no original data |
| Han F.<br>Safety of topical calcineurin inhibitors for hailey-hailey disease<br>JAMA - Journal of the American Medical Association / 2018;320(11):1200                                                                                                                                                                                                | Letter/editorial no original data |

|                                                                                                                                                                                                                                                                                                                                                                                                                                                                                                                                                                                                                                                                                                                                                                                                                                                                                                                                               |                                   |
|-----------------------------------------------------------------------------------------------------------------------------------------------------------------------------------------------------------------------------------------------------------------------------------------------------------------------------------------------------------------------------------------------------------------------------------------------------------------------------------------------------------------------------------------------------------------------------------------------------------------------------------------------------------------------------------------------------------------------------------------------------------------------------------------------------------------------------------------------------------------------------------------------------------------------------------------------|-----------------------------------|
| Hanifin, Jon M<br>A Reassuring Rejoinder Against Malignant Influences of Topical Calcineurin Use in Children.<br>JAMA dermatology / 2015;151(6):587-8                                                                                                                                                                                                                                                                                                                                                                                                                                                                                                                                                                                                                                                                                                                                                                                         | Letter/editorial no original data |
| Lewis F.M.; Neill S.M.<br>Safety of calcineurin inhibitors in the management of lichen sclerosis [17]<br>British Journal of Dermatology / 2007;156(6):1389                                                                                                                                                                                                                                                                                                                                                                                                                                                                                                                                                                                                                                                                                                                                                                                    | Letter/editorial no original data |
| Margolis D.J.; Abuabara K.; Hoffstad O.J.; Wan J.; Raimondo D.; Bilker W.B.<br>Association between leukemia and topical use of pimecrolimus: In reply<br>JAMA Dermatology / 2015;151(12):1391-1392                                                                                                                                                                                                                                                                                                                                                                                                                                                                                                                                                                                                                                                                                                                                            | Letter/editorial no original data |
| Ormerod, A D<br>Topical tacrolimus and pimecrolimus and the risk of cancer: how much cause for concern?.<br>The British journal of dermatology / 2005;153(4):701-5                                                                                                                                                                                                                                                                                                                                                                                                                                                                                                                                                                                                                                                                                                                                                                            | Letter/editorial no original data |
| Ribero, S; Borradori, L<br>Re: risk of malignancy and systemic absorption after application of topical tacrolimus in oral lichen planus.<br>Journal of the European Academy of Dermatology and Venereology : JEADV / 2017;31(2):e85-e86                                                                                                                                                                                                                                                                                                                                                                                                                                                                                                                                                                                                                                                                                                       | Letter/editorial no original data |
| Yew Y.W.; Tey H.L.<br>Association between leukemia and topical use of pimecrolimus<br>JAMA Dermatology / 2015;151(12):1390-1391                                                                                                                                                                                                                                                                                                                                                                                                                                                                                                                                                                                                                                                                                                                                                                                                               | Letter/editorial no original data |
| Ribero, S.; Stieger, M.; Quaglino, P.; Hongang, T.; Bornstein, M. M.; Naldi, L.; Borradori, L.<br>Efficacy of topical tacrolimus for oral lichen planus: real-life experience in a retrospective cohort of patients with a review of the literature<br>Journal of the European Academy of Dermatology and Venereology 2015;29(6):1107-1113                                                                                                                                                                                                                                                                                                                                                                                                                                                                                                                                                                                                    | no comparator group               |
| Naylor, Mark; Elmets, Craig; Jaracz, Eileen; Rico, Joyce M<br>Non-melanoma skin cancer in patients with atopic dermatitis treated with topical tacrolimus.<br>The Journal of dermatological treatment / 2005;16(3):149-53                                                                                                                                                                                                                                                                                                                                                                                                                                                                                                                                                                                                                                                                                                                     | no comparator group               |
| Reitamo S.; Rustin M.; Harper J.; Kalimo K.; Rubins A.; Cambazard F.; Brenninkmeijer E.E.A.; Smith C.; Berth-Jones J.; Ruzicka T.; Sharpe G.; Taieb A.; De Raeve L.; Groonhooj-Larsen C.; Remitz A.; Turjanmaa K.; Perrot J.L.; Boralevi F.; Dubertret L.; Lahfa M.; Misery L.; De Prost Y.; Bodemer C.; Stadler J.F.; Barbarot S.; Plantin P.; Schoenlaub P.; Lorette G.; Khallouf R.; Beylot C.; Bruckner-Tuderman L.; Wollenberg A.; Kamann S.; Kapp A.; Fartasch M.; Folster-Holst R.; Bieber T.; Ring J.; Dobozy A.; Kemeny L.; Murphy G.; Barry J.; Bourke J.; Valdmann N.; Blaszczyk M.; Wolska H.; Bos J.; Carralero L.; Carrera C.; Martinez C.; Pichardo A.R.; De Frutos O.; Uceda E.S.-L.; Waite A.; Green A.; Friedmann P.; Finlay A.; Griffiths C.<br>A 4-year follow-up study of atopic dermatitis therapy with 0.1% tacrolimus ointment in children and adult patients<br>British Journal of Dermatology / 2008;159(4):942-951 | no comparator group               |
| Remitz A.; Harper J.; Rustin M.; Goldschmidt W.F.M.; Palatsi R.; Van Der Valk P.G.M.; Sharpe G.; Smith C.H.; Dobozy A.; Turjanmaa K.<br>Long-term safety and efficacy of tacrolimus ointment for the treatment of atopic dermatitis in                                                                                                                                                                                                                                                                                                                                                                                                                                                                                                                                                                                                                                                                                                        | no comparator group               |



|                                                                                                                                                                                                                                                                                                                                                                                                           |                                |
|-----------------------------------------------------------------------------------------------------------------------------------------------------------------------------------------------------------------------------------------------------------------------------------------------------------------------------------------------------------------------------------------------------------|--------------------------------|
| <p>children<br/>Acta Dermato-Venereologica / 2007;87(1):54-61</p>                                                                                                                                                                                                                                                                                                                                         |                                |
| <p>Tan J.; Langley R.<br/>Safety and efficacy of tacrolimus ointment 0.1% (Protopic™) in atopic dermatitis: A Canadian open-label multicenter study<br/>Journal of Cutaneous Medicine and Surgery / 2004;8(4):213-219</p>                                                                                                                                                                                 | no comparator group            |
| <p>Dayal, Surabhi; Sahu, Priyadarshini; Gupta, Nidhi<br/>Treatment of Childhood Vitiligo Using Tacrolimus Ointment with Narrowband Ultraviolet B Phototherapy.<br/>Pediatric dermatology / 2016;33(6):646-651</p>                                                                                                                                                                                         | Outcome - not assessing cancer |
| <p>Elad S.; Or R.; Resnick I.; Shapira M.Y.<br/>Topical tacrolimus - A novel treatment alternative for cutaneous chronic graft-versus-host disease<br/>Transplant International / 2003;16(9):665-670</p>                                                                                                                                                                                                  | Outcome - not assessing cancer |
| <p>Fleischer Jr. A.B.; Ling M.; Eichenfield L.; Satoi Y.; Jaracz E.; Rico M.J.; Maher R.M.<br/>Tacrolimus ointment for the treatment of atopic dermatitis is not associated with an increase in cutaneous infections<br/>Journal of the American Academy of Dermatology / 2002;47(4):562-570</p>                                                                                                          | Outcome - not assessing cancer |
| <p>Hanifin J.M.; Paller A.S.; Eichenfield L.; Clark R.A.; Korman N.; Weinstein G.; Caro I.; Jaracz E.; Rico M.J.<br/>Efficacy and safety of tacrolimus ointment treatment for up to 4 years in patients with atopic dermatitis<br/>Journal of the American Academy of Dermatology / 2005;53(2 SUPPL. 2):S186-S194</p>                                                                                     | Outcome - not assessing cancer |
| <p>Kapoor, R.; Hoffstad, O.; Bilker, W.; Margolis, D. J.<br/>The Frequency and Intensity of Topical Pimecrolimus Treatment in Children with Physician-Confirmed Mild to Moderate Atopic Dermatitis<br/>Pediatric Dermatology 2009;26(6):682-687</p>                                                                                                                                                       | Outcome - not assessing cancer |
| <p>Kuiper J.G.; van Herk-Sukel M.P.P.; Castellsague J.; Pottegard A.; Berglind I.A.; Dedman D.; Gutierrez L.; Calingaert B.; Hallas J.; Sundstrom A.; Gallagher A.M.; Kaye J.A.; Pardo C.; Rothman K.J.; Perez-Gutthann S.<br/>Use of Topical Tacrolimus and Topical Pimecrolimus in Four European Countries: A Multicentre Database Cohort Study<br/>Drugs - Real World Outcomes / 2018;5(2):109-116</p> | Outcome - not assessing cancer |
| <p>Kyriakou, A.; Patsialas, C.; Patsatsi, A.; Sotiriadis, D.<br/>Treatment of male genital lichen sclerosus with clobetasol propionate and maintenance with either methylprednisolone aceponate or tacrolimus: a retrospective study<br/>Journal of Dermatological Treatment 2013;24(6):431-434</p>                                                                                                       | Outcome - not assessing cancer |
| <p>Lubbe J.; Friedlander S.F.; Cribier B.; Morren M.-A.; Garcia-Diez A.; Gelmetti C.; Hofmann H.; Houwing R.H.; Kownacki S.; Langley R.G.B.; Virtanen M.; Wolff K.; Wisseh S.; McGeown C.; Abrams B.; Schneider D.<br/>Safety, Efficacy, and Dosage of 1% Pimecrolimus Cream for the Treatment of Atopic Dermatitis</p>                                                                                   | Outcome - not assessing cancer |

|                                                                                                                                                                                                                                                                                                                       |                                       |
|-----------------------------------------------------------------------------------------------------------------------------------------------------------------------------------------------------------------------------------------------------------------------------------------------------------------------|---------------------------------------|
| <p>in Daily Practice<br/>American Journal of Clinical Dermatology / 2006;7(2):121-131</p>                                                                                                                                                                                                                             |                                       |
| <p>MacMillan M.L.; Weisdorf D.J.; Davies S.M.; DeFor T.E.; Burns L.J.; Ramsay N.K.C.; Wagner J.E.; Blazar B.R.</p> <p>Early antithymocyte globulin therapy improves survival in patients with steroid-resistant acute graft-versus-host disease<br/>Biology of Blood and Marrow Transplantation / 2002;8(1):40-46</p> | <p>Outcome - not assessing cancer</p> |
| <p>Mandelin J.; Remitz A.; Virtanen H.; Reitamo S.</p> <p>Recall antigen reactions in patients with atopic dermatitis treated with tacrolimus ointment for 1 year<br/>Journal of Allergy and Clinical Immunology / 2008;121(3):777-779</p>                                                                            | <p>Outcome - not assessing cancer</p> |
| <p>Mashiah, J; Harel, A; Bodemer, C; Hadj-Rabia, S; Goldberg, I; Sprecher, E; Kutz, A</p> <p>Topical pimecrolimus for paediatric cutaneous mastocytosis.<br/>Clinical and experimental dermatology / 2018;43(5):559-565</p>                                                                                           | <p>Outcome - not assessing cancer</p> |
| <p>Nivenius, E.; van der Ploeg, I.; Jung, K.; Chrissanthou, E.; van Hage, M.; Montan, P. G.</p> <p>Tacrolimus ointment vs steroid ointment for eyelid dermatitis in patients with atopic keratoconjunctivitis<br/>Eye 2007;21(7):968-975</p>                                                                          | <p>Outcome - not assessing cancer</p> |
| <p>Oskay T.; Kaya Sezer H.; Genc C.; Kutluay L.</p> <p>Pimecrolimus 1% cream in the treatment of vulvar lichen sclerosus in postmenopausal women<br/>International Journal of Dermatology / 2007;46(5):527-532</p>                                                                                                    | <p>Outcome - not assessing cancer</p> |
| <p>Patrascu, V; Giurca, Claudia; Ciurea, Raluca Niculina; Georgescu, Claudia Valentina</p> <p>Disseminated granuloma annulare: study on eight cases.<br/>Romanian journal of morphology and embryology = Revue roumaine de morphologie et embryologie / 2013;54(2):327-31</p>                                         | <p>Outcome - not assessing cancer</p> |
| <p>Pereira N.; Brites M.M.; Goncalo M.; Tellechea O.; Figueiredo A.</p> <p>Pyoderma gangrenosum - A review of 24 cases observed over 10years<br/>International Journal of Dermatology / 2013;52(8):938-945</p>                                                                                                        | <p>Outcome - not assessing cancer</p> |
| <p>Resende J.P.M.; Das Chaves M.G.A.M.; Aarestrup F.M.; Aarestrup B.V.; Olate S.; Netto H.D.</p> <p>Oral lichen planus treated with tacrolimus 0.1%<br/>International Journal of Clinical and Experimental Medicine / 2013;6(10):917-921</p>                                                                          | <p>Outcome - not assessing cancer</p> |
| <p>Song J.S.; London W.B.; Hawryluk E.B.; Guo D.; Sridharan M.; Fisher D.E.; Lehmann L.E.; Duncan C.N.; Huang J.T.</p> <p>Risk of melanocytic nevi and nonmelanoma skin cancer in children after allogeneic hematopoietic stem cell transplantation<br/>Bone Marrow Transplantation / 2017;52(7):989-997</p>          | <p>Outcome - not assessing cancer</p> |

|                                                                                                                                                                                                                                                                                                                                                                                                                                                                                        |                                       |
|----------------------------------------------------------------------------------------------------------------------------------------------------------------------------------------------------------------------------------------------------------------------------------------------------------------------------------------------------------------------------------------------------------------------------------------------------------------------------------------|---------------------------------------|
| <p>Villanueva, Fernanda N; Perez-Simon, Jose Antonio; Silva, Fernando F; Caballero-Velazquez, Teresa T; Sanchez-Guijo, Fermin F; Canizo, Conzuelo C; Vazquez, Lourdes L; Caballero, Dolores D; San Miguel, Jesus F</p> <p>Oral beclomethasone dipropionate for the treatment of gastrointestinal chronic graft-versus-host disease.</p> <p>Biology of blood and marrow transplantation : journal of the American Society for Blood and Marrow Transplantation / 2009;15(10):1331-6</p> | <p>Outcome - not assessing cancer</p> |
| <p>Wataya-Kaneda, M; Tanaka, M; Nakamura, A; Matsumoto, S; Katayama, I</p> <p>A topical combination of rapamycin and tacrolimus for the treatment of angiofibroma due to tuberous sclerosis complex (TSC): a pilot study of nine Japanese patients with TSC of different disease severity.</p> <p>The British journal of dermatology / 2011;165(4):912-6</p>                                                                                                                           | <p>Outcome - not assessing cancer</p> |
| <p>Albert, Michael H; Becker, B; Schuster, F R; Klein, B; Binder, V; Adam, K; Nienhoff, C; Fuhrer, M; Borkhardt, A</p> <p>Oral graft vs. host disease in children--treatment with topical tacrolimus ointment.</p> <p>Pediatric transplantation / 2007;11(3):306-11</p>                                                                                                                                                                                                                | <p>Outcome - not assessing cancer</p> |
| <p>Xu, A. E.; Zhang, D. M.; Wei, X. D.; Huang, B.; Lu, L. J.</p> <p>Efficacy and safety of tacrolimus cream 0.1% in the treatment of vitiligo</p> <p>International Journal of Dermatology 2009;48(1):86-90</p>                                                                                                                                                                                                                                                                         | <p>Outcome - not assessing cancer</p> |
| <p>Albuquerque A.; Cappello C.; Cuming T.; De Masi A.; Bowring J.; Rosenthal A.N.; Nathan M.</p> <p>Anal high-grade squamous intraepithelial lesions in pharmacologically immunocompromised patients followed in a referral center</p> <p>Diseases of the Colon and Rectum / 2018;61(11):1267-1272</p>                                                                                                                                                                                 | <p>not treated with TCI</p>           |
| <p>Damento G.M.; Pulido J.S.; Abbott B.A.; Hodge D.O.; Dalvin L.A.</p> <p>TNF-Alpha Inhibition and Other Immunosuppressants in the Development of Uveal and Cutaneous Melanoma</p> <p>Mayo Clinic Proceedings / 2019;94(7):1287-1295</p>                                                                                                                                                                                                                                               | <p>not treated with TCI</p>           |
| <p>Gu Y.; Nordstrom B.L.</p> <p>The risk of malignancy among biologic-naive pediatric psoriasis patients: A retrospective cohort study in a US claims database</p> <p>Journal of the American Academy of Dermatology / 2017;77(2):293</p>                                                                                                                                                                                                                                              | <p>not treated with TCI</p>           |
| <p>Kesic, L.; Obradovic, R.; Mihailovic, D.; Radicevic, G.; Stankovic, S.; Todorovic, K.</p> <p>Incidence and treatment outcome of oral lichen planus in southeast Serbia in a 10-year period (1997-2007)</p> <p>Vojnosanitetski Pregled 2009;66(6):435-439</p>                                                                                                                                                                                                                        | <p>not treated with TCI</p>           |
| <p>Kirtschig, G.; Wakelin, S. H.; Wojnarowska, F.</p> <p>Mucosal vulval lichen planus: outcome, clinical and laboratory features</p> <p>Journal of the European Academy of Dermatology and Venereology 2005;19(3):301-307</p>                                                                                                                                                                                                                                                          | <p>not treated with TCI</p>           |
| <p>Michajlowski I.; Panek D.; Sobjanek M.; Michajlowski J.; Wlodarkiewicz A.</p> <p>Malignant transformation in patients with penile lichen sclerosis</p> <p>Przegląd Dermatologiczny / 2012;99(4):390-391</p>                                                                                                                                                                                                                                                                         | <p>not treated with TCI</p>           |

|                                                                                                                                                                                                                                                                                     |                      |
|-------------------------------------------------------------------------------------------------------------------------------------------------------------------------------------------------------------------------------------------------------------------------------------|----------------------|
| Mithoefer A.B.; Supran S.; Freeman R.B.<br>Risk factors associated with the development of skin cancer after liver transplantation<br>Liver Transplantation / 2002;8(10):939-944                                                                                                    | not treated with TCI |
| Saigal S.; Norris S.; Muiesan P.; Rela M.; Heaton N.; O'Grady J.<br>Evidence of differential risk for posttransplantation malignancy based on pretransplantation caused in patients undergoing liver transplantation<br>Liver Transplantation / 2002;8(5):482-487                   | not treated with TCI |
| Dyer, R. K.; Weinstock, M. A.; Cohen, T. S. D.; Rizzo, A. E.; Bingham, S. F.; Grp, Vattc Trial<br>Predictors of Basal Cell Carcinoma in High-Risk Patients in the VATTC (VA Topical Tretinoin Chemoprevention) Trial<br>Journal of Investigative Dermatology 2012;132(11):2544-2551 | not treated with TCI |
| Anonymous.<br>Pimecrolimus and tacrolimus linked to cancer increase<br>WHO Drug Information / 2005;19(2):110                                                                                                                                                                        | Review article       |
| Bernard L.A.; Eichenfield L.F.<br>Topical immunomodulators for atopic dermatitis<br>Current Opinion in Pediatrics / 2002;14(4):414-418                                                                                                                                              | Review article       |
| DePry J.L.; Reed K.B.; Cook-Norris R.H.; Brewer J.D.<br>Iatrogenic immunosuppression and cutaneous malignancy<br>Clinics in Dermatology / 2011;29(6):602-613                                                                                                                        | Review article       |
| Fleischer, Alan B Jr<br>Black box warning for topical calcineurin inhibitors and the death of common sense.<br>Dermatology online journal / 2006;12(6):2                                                                                                                            | Review article       |
| Furue M.; Uchi H.; Moroi Y.; Ogawa S.; Nakahara T.; Urabe K.<br>Topical tacrolimus in the management of atopic dermatitis in Japan<br>Dermatologic Therapy / 2006;19(2):118-126                                                                                                     | Review article       |
| Hultsch, Thomas; Kapp, Alexander; Spergel, Jonathan<br>Immunomodulation and safety of topical calcineurin inhibitors for the treatment of atopic dermatitis.<br>Dermatology (Basel, Switzerland) / 2005;211(2):174-87                                                               | Review article       |
| Kapp A.; Allen B.R.; Reitamo S.<br>Atopic dermatitis management with tacrolimus ointment (Protopic)<br>Journal of Dermatological Treatment / 2003;14(SUPPL. 1):5-16                                                                                                                 | Review article       |
| Kida A.; McDonald G.B.<br>Gastrointestinal, hepatobiliary, pancreatic, and iron-related diseases in long-term survivors of allogeneic hematopoietic cell transplantation<br>Seminars in Hematology / 2012;49(1):43-58                                                               | Review article       |
| Kuijken I.; Bouwes Bavinck J.N.<br>Skin cancer risk associated with immunosuppressive therapy in organ transplant recipients:                                                                                                                                                       | Review article       |

|                                                                                                                                                                                                                                                                                                                                                                                                                                                                                                                                                                                                                       |                |
|-----------------------------------------------------------------------------------------------------------------------------------------------------------------------------------------------------------------------------------------------------------------------------------------------------------------------------------------------------------------------------------------------------------------------------------------------------------------------------------------------------------------------------------------------------------------------------------------------------------------------|----------------|
| Epidemiology and proposed mechanisms<br>BioDrugs / 2000;14(5):319-329                                                                                                                                                                                                                                                                                                                                                                                                                                                                                                                                                 |                |
| Langa, Y.; Van der Merwe, E.<br><br>Atopic dermatitis: tacrolimus vs. topical corticosteroid use<br>Sa Pharmaceutical Journal Incorporating Pharmacy Management 2016;83(3):11-+                                                                                                                                                                                                                                                                                                                                                                                                                                       | Review article |
| Langa Y.; Van Der Merwe E.<br><br>Atopic dermatitis - Tacrolimus vs topical corticosteroid use<br>SA Pharmaceutical Journal / 2010;77(10):50-56                                                                                                                                                                                                                                                                                                                                                                                                                                                                       | Review article |
| Lebwohl, Mark; Gower, Tara<br><br>A safety assessment of topical calcineurin inhibitors in the treatment of atopic dermatitis.<br>MedGenMed : Medscape general medicine / 2006;8(4):8                                                                                                                                                                                                                                                                                                                                                                                                                                 | Review article |
| Lok C.; Viseux V.; Denoeux J.P.; Bagot M.<br><br>Post-transplant cutaneous T-cell lymphomas<br>Critical Reviews in Oncology/Hematology / 2005;56(1 SPEC. ISS.):137-145                                                                                                                                                                                                                                                                                                                                                                                                                                                | Review article |
| McPherson, Tess; Cooper, Susan<br><br>Vulval lichen sclerosus and lichen planus.<br>Dermatologic therapy / 2010;23(5):523-32                                                                                                                                                                                                                                                                                                                                                                                                                                                                                          | Review article |
| Munzenberger, Paul J; Montejo, Jenny M<br><br>Safety of topical calcineurin inhibitors for the treatment of atopic dermatitis.<br>Pharmacotherapy / 2007;27(7):1020-8                                                                                                                                                                                                                                                                                                                                                                                                                                                 | Review article |
| Nicholson S.<br><br>Management of metastatic skin cancers in organ transplant recipients<br>Skin Cancer after Organ Transplantation Cancer Treatment and Research / 2009;146((Nicholson) University Hospitals of Leicester, Leicester, United Kingdom):467-481                                                                                                                                                                                                                                                                                                                                                        | Review article |
| Qureshi A.A.; Fischer M.A.<br><br>Topical calcineurin inhibitors for atopic dermatitis: Balancing clinical benefit and possible risks<br>Archives of Dermatology / 2006;142(5):633-637                                                                                                                                                                                                                                                                                                                                                                                                                                | Review article |
| Saraswat A.<br><br>Topical corticosteroid use in children: Adverse effects and how to minimize them<br>Indian Journal of Dermatology, Venereology and Leprology / 2010;76(3):225-228                                                                                                                                                                                                                                                                                                                                                                                                                                  | Review article |
| Schreve B.S.; Anliker M.; Arnold A.W.; Kempf W.; Laffitte E.; Lapointe A.-K.; Mainetti C.; Pelloni F.; Oberholzer P.; Serra A.; Streit M.; Hofbauer G.F.L.<br><br>Pre- and posttransplant management of solid organ transplant recipients: Risk-adjusted follow-up<br>Transplantation Dermatology Current Problems in Dermatology / 2012;43((Schreve, Kempf, Serra, Hofbauer) Dermatologische Klinik, Universittsspital Zurich, Gloriastrasse 31, CH-8091 Zurich, Switzerland (Anliker) Kantonsspital St. Gallen, Lausanne, Switzerland (Arnold) Universitatsspital Basel, Lausanne, Switzerland (Laffitte) Ho):57-70 | Review article |

|                                                                                                                                                                                                                                                                                                                              |                |
|------------------------------------------------------------------------------------------------------------------------------------------------------------------------------------------------------------------------------------------------------------------------------------------------------------------------------|----------------|
| <p>Stockfleth, E; Ulrich, C; Meyer, T; Christophers, E</p> <p>Epithelial malignancies in organ transplant patients: clinical presentation and new methods of treatment.<br/>Recent results in cancer research. Fortschritte der Krebsforschung. Progres dans les recherches sur le cancer / 2002;160(r1y, 0044671):251-8</p> | Review article |
| <p>Thaci, Diamant; Salgo, Rebekka</p> <p>The topical calcineurin inhibitor pimecrolimus in atopic dermatitis: a safety update.<br/>Acta dermatovenerologica Alpina, Pannonica, et Adriatica / 2007;16(2):58-62</p>                                                                                                           | Review article |
| <p>Thaci, Diamant; Salgo, Rebekka</p> <p>Malignancy concerns of topical calcineurin inhibitors for atopic dermatitis: facts and controversies.<br/>Clinics in dermatology / 2010;28(1):52-6</p>                                                                                                                              | Review article |
| <p>Weischer, Maren; Rocken, Martin; Berneburg, Mark</p> <p>Calcineurin inhibitors and rapamycin: cancer protection or promotion?.<br/>Experimental dermatology / 2007;16(5):385-93</p>                                                                                                                                       | Review article |
| <p>Werfel T.</p> <p>Topical use of pimecrolimus in atopic dermatitis<br/>JDDG - Journal of the German Society of Dermatology / 2009;7(9):739-742</p>                                                                                                                                                                         | Review article |
| <p>Wolff K.; Stuetz A.</p> <p>Pimecrolimus for the treatment of inflammatory skin disease<br/>Expert Opinion on Pharmacotherapy / 2004;5(3):643-655</p>                                                                                                                                                                      | Review article |
| <p>Yesudian, Paul D</p> <p>The role of calcineurin inhibitors in the management of lichen sclerosus.<br/>American journal of clinical dermatology / 2009;10(5):313-8</p>                                                                                                                                                     | Review article |

**eFigure 1.** Summary of Meta-analyses of Cancer Risk With TCI Treatment and Nonactive Comparator in Cohort Studies

**TCI Cancer Risk with Non-Active Comparator**

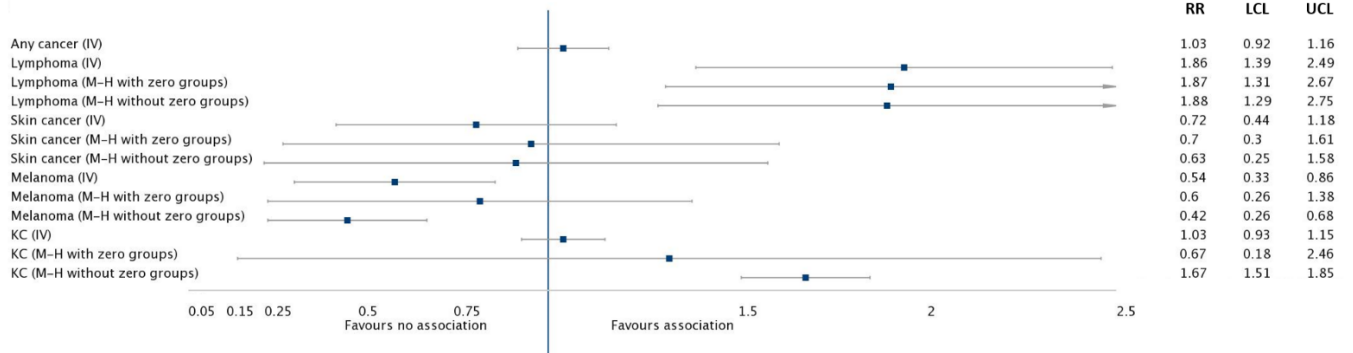

Abbreviations: IV, Inverse Variance; M-H, Mantel-Haenszel; KC, Keratinocyte Carcinoma; RR, Relative Risk; Plot generated by DistillerSR Forest Plot Generator from Evidence Partners

**eFigure 2.** Summary of Meta-analyses of Cancer Risk With TCI Treatment and TCS Comparator in Cohort Studies

**TCI Cancer Risk with Active Comparator**

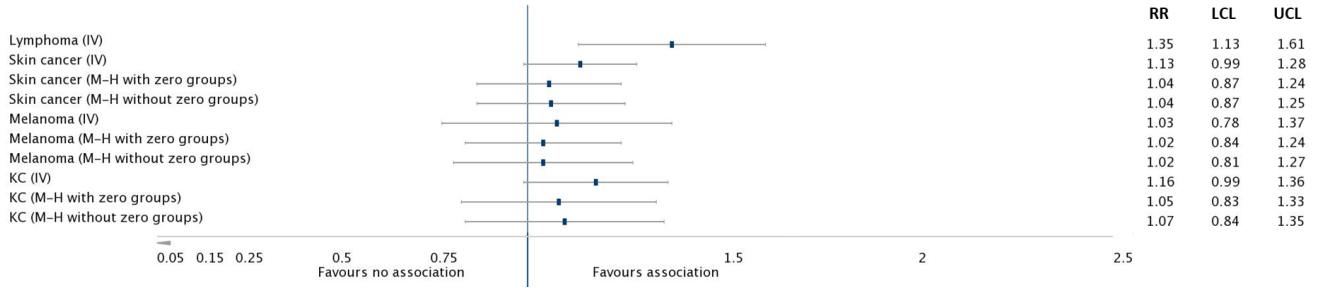

Abbreviations: IV, Inverse Variance; M-H, Mantel-Haenszel; KC, Keratinocyte Carcinoma; Plot generated by DistillerSR Forest Plot Generator from Evidence Partners



**eFigure 3.** Funnel Plot for Any Cancer With Nonactive Comparator

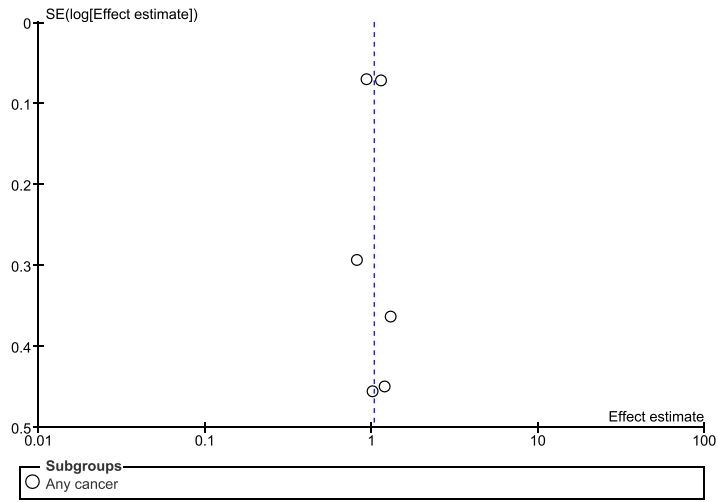

**eFigure 4.** Funnel Plot for Lymphoma With Nonactive Comparator

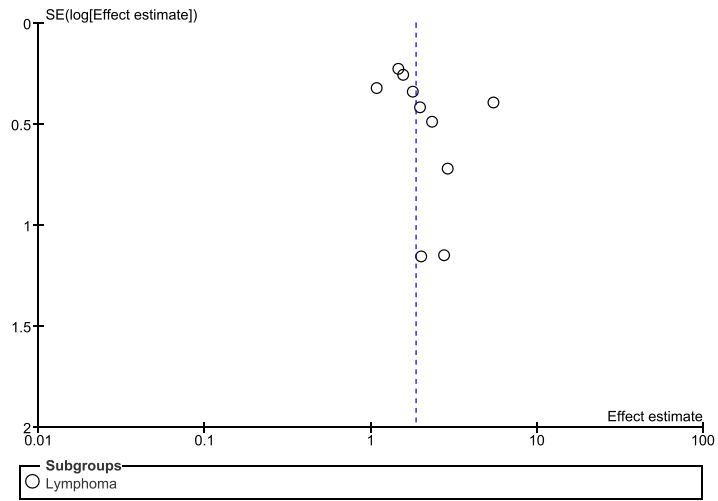

**eFigure 5.** Funnel Plot for Skin Cancer With Nonactive Comparator

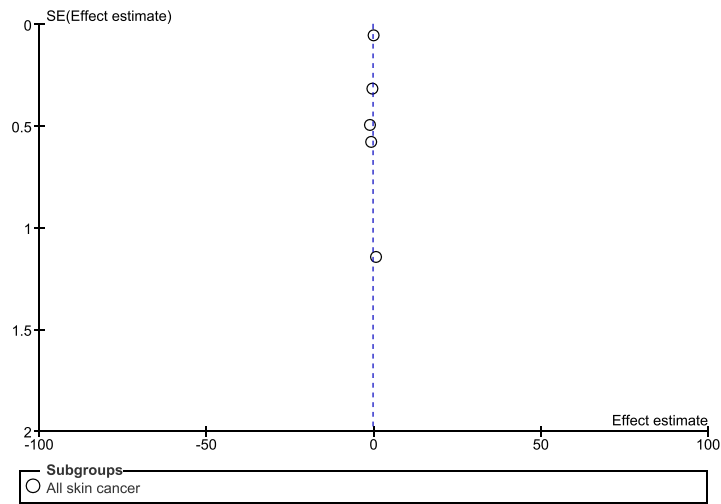

**eFigure 6.** Funnel Plot for Lymphoma With TCS Comparator

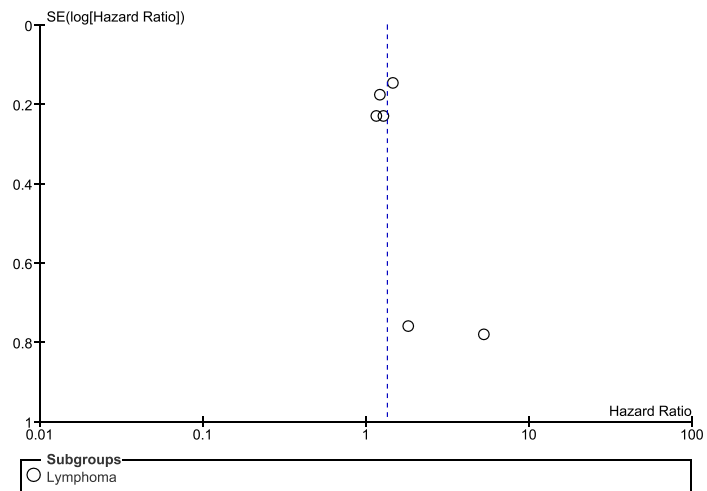

**eFigure 7.** Funnel Plot for Skin Cancer With TCS Comparator

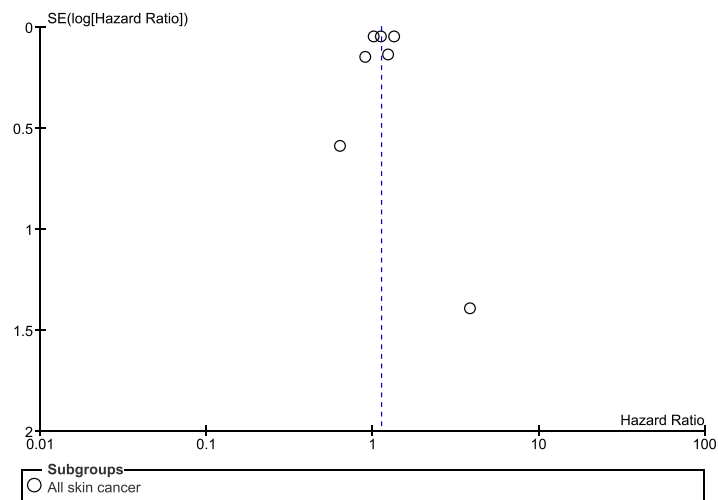

Supplement: jamadermatol-e210345-s001.pdf [file jamadermatol-e210345-s001.pdf]
